# Supplementary material
Source: Springer Nature journal article supplement (https://www.springermedizin.de/resource/supplementary/12885_2012_3644_MOESM3_ESM.pdf/9465038)

Without GPAP

With GPAP

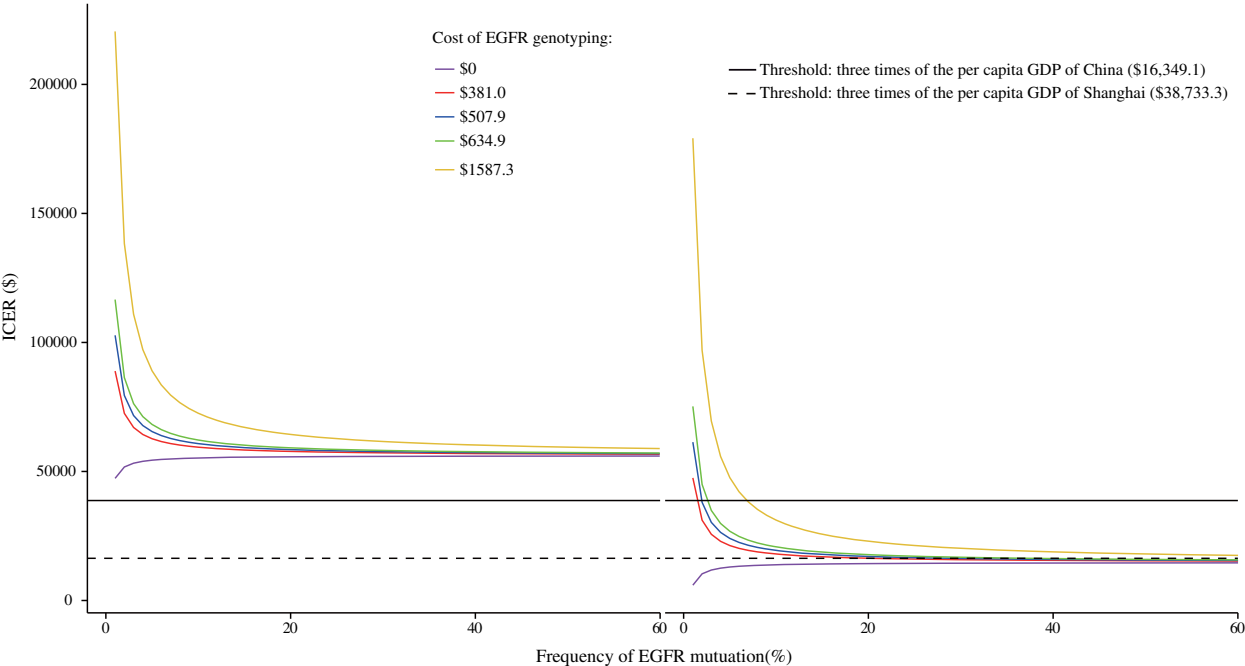

Supplement: MOESM3 [file 9465038]
